# Supplementary material for: Commitment and (in) Efficiency: A Bargaining Experiment
Source: Oxford University Press journal article supplement (doi:10.1093/jeea/jvaa012), 2020-04-21
Supplement: jvaa012_agranov_elliott_teaching_materials.zip [file jvaa012_agranov_elliott_teaching_materials.zip]

Black parts of the bars are the final deals  
 Grey parts of the bars are the transitional deals  
 Height of the bar indicates the total number of deals of this kind in this quintile

## COMPLETE SUPERMODULAR

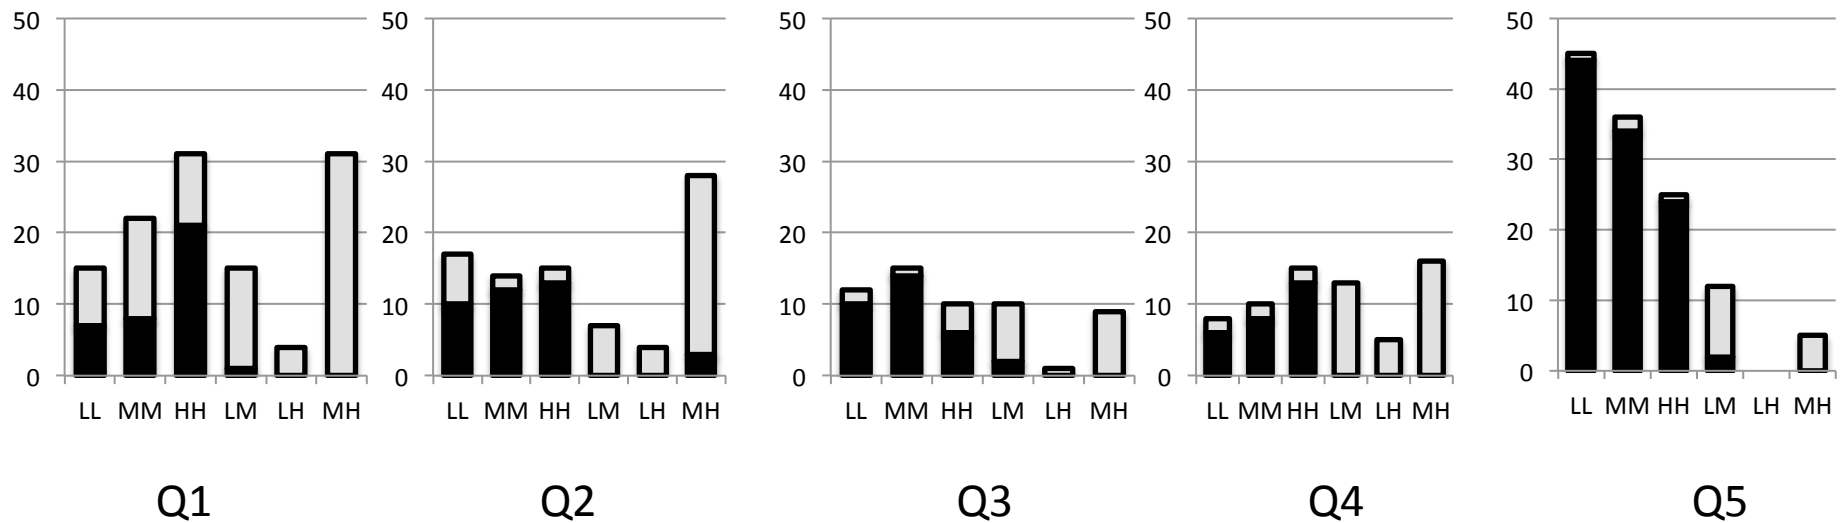

In what order 'final' deals in each market are made?

HML = 49%

MHL = 9%

LHM = 3%

HLM = 9%

MLH = 4%

LMH = 21%

## COMPLETE SUBMODULAR

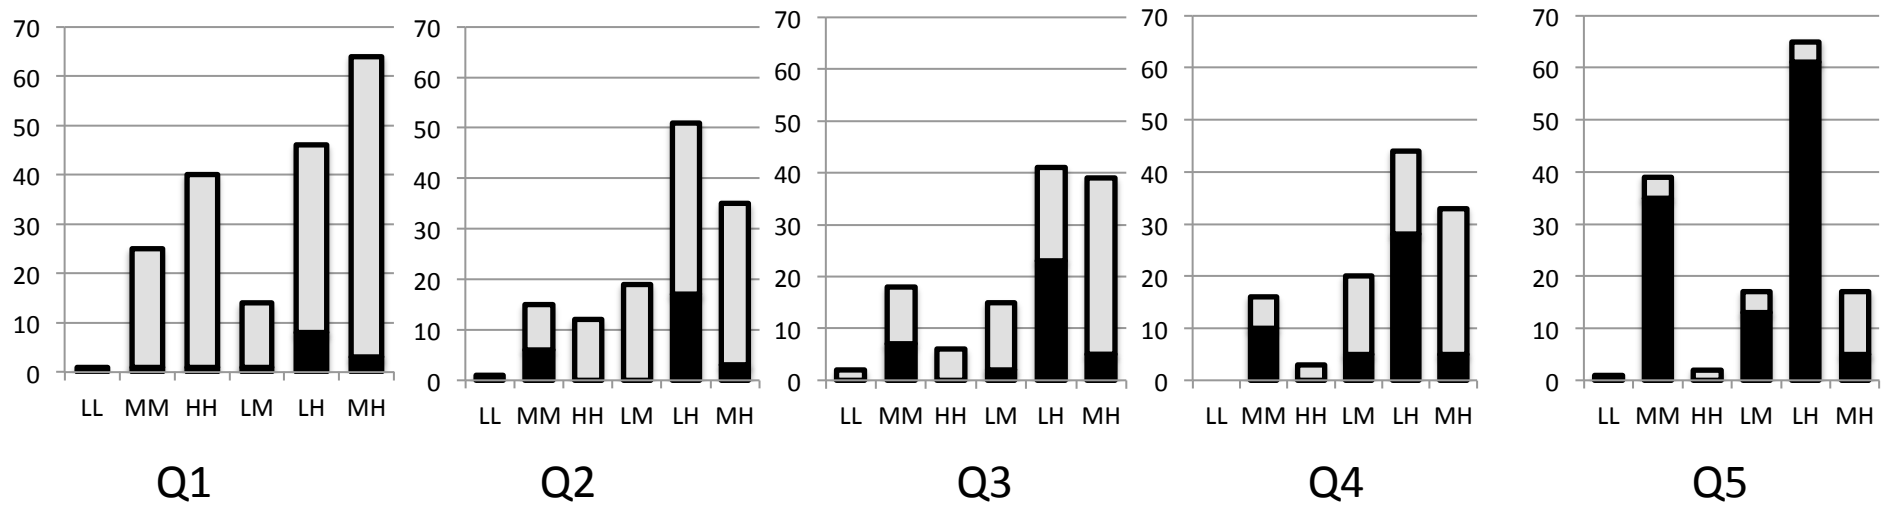

How often MM is the last deal made in a market?  
This happens in 45% of the markets

## INCOMPLETE SUPERMODULAR

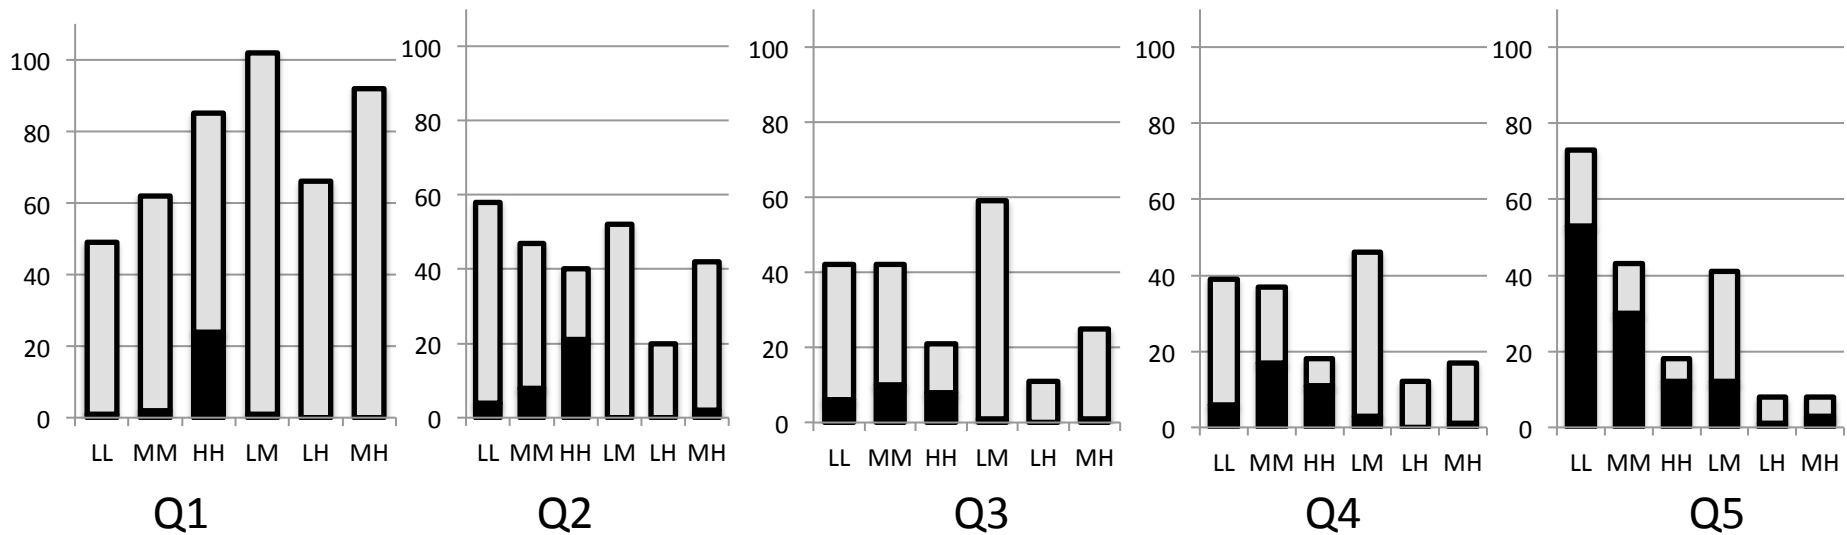

In what order `final' deals in each market are made?

HML = 58%

HLM = 6%

MHL = 0%

MLH = 11%

LHM = 1%

LMH = 8%

## INCOMPLETE SUBMODULAR

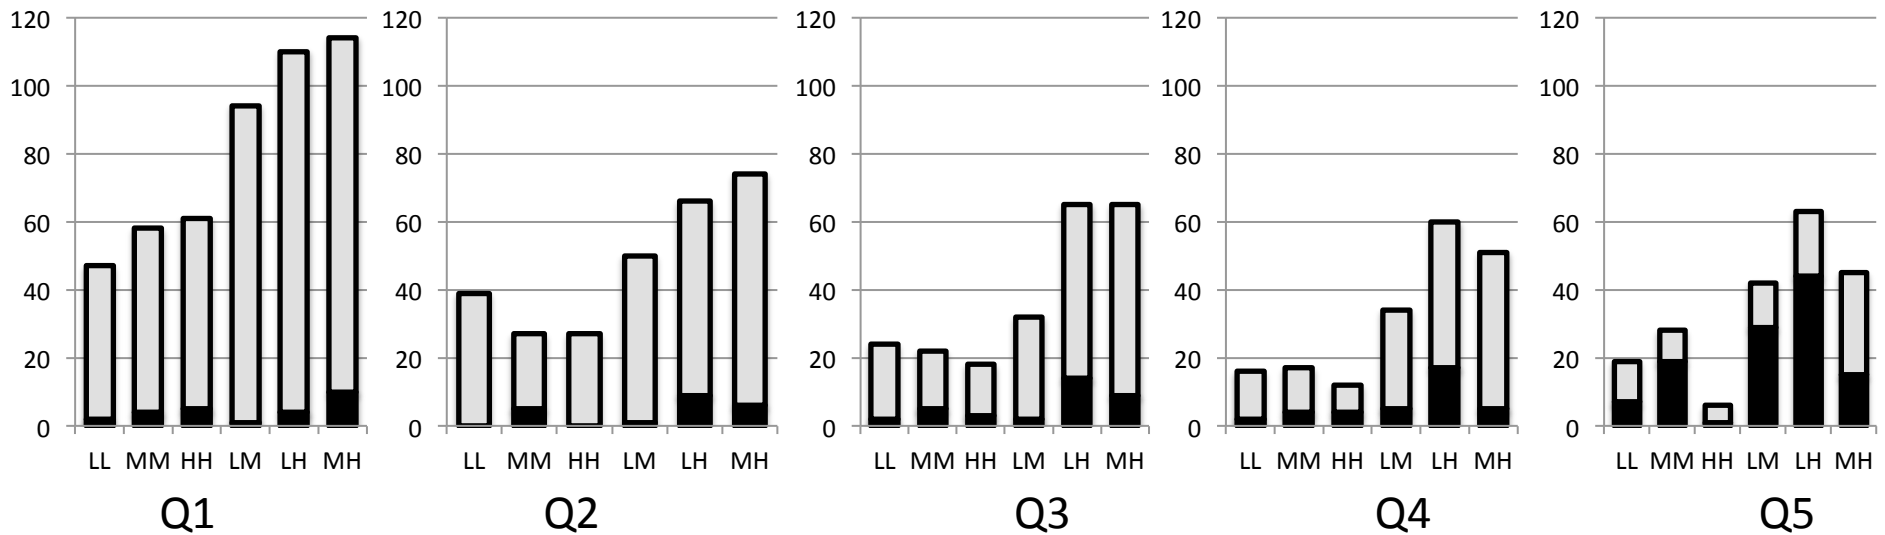

How often MM is the last deal made in a market?  
This happens in 21% of the markets
