# Supplementary material for: Commitment and (in) Efficiency: A Bargaining Experiment
Source: Oxford University Press journal article supplement (doi:10.1093/jeea/jvaa012), 2020-04-21

### Exit 15 – strong responders

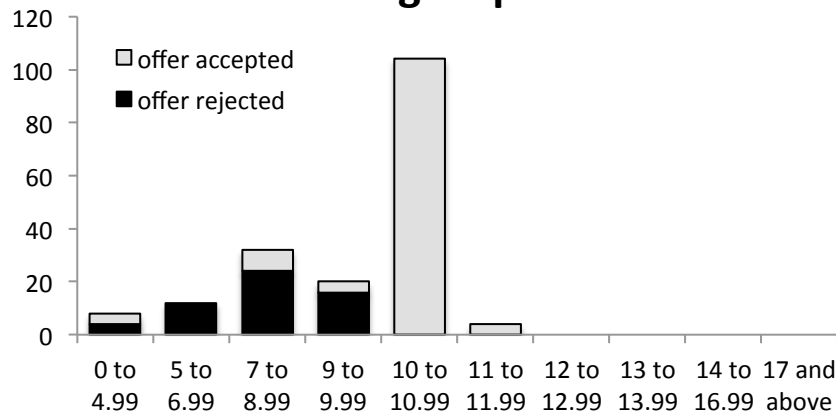

### Exit 15 – weak responders

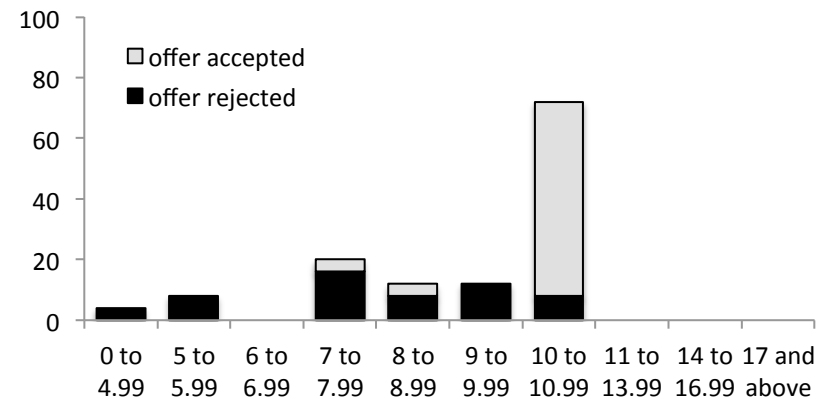

### Exit 25 – strong responders

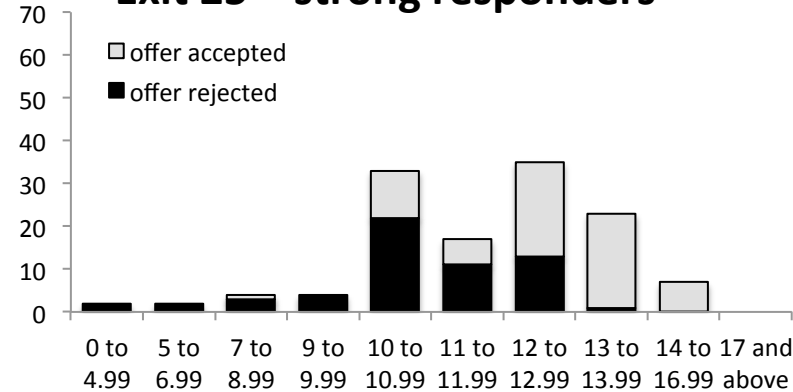

### Exit 25 – weak responders

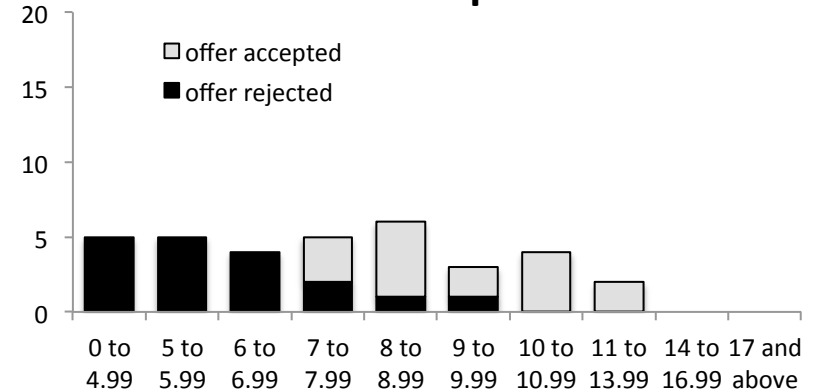

### Exit 30 – strong responders

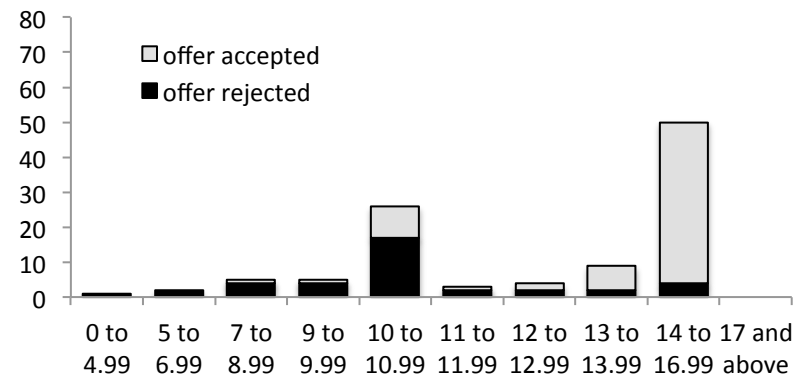

### Exit 30 – weak responders

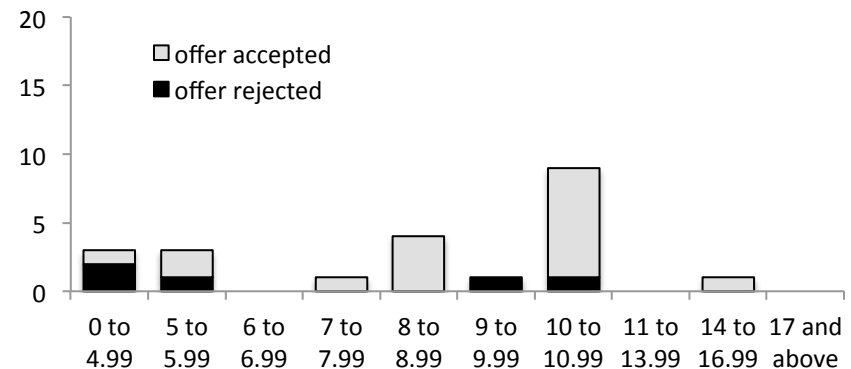

Supplement: jvaa012_agranov_elliott_teaching_materials.zip [file jvaa012_agranov_elliott_teaching_materials.zip]
