# Supplementary material for: Commitment and (in) Efficiency: A Bargaining Experiment
Source: Oxford University Press journal article supplement (doi:10.1093/jeea/jvaa012), 2020-04-21
Supplement: jvaa012_agranov_elliott_teaching_materials.zip [file jvaa012_agranov_elliott_teaching_materials.zip]

Please propose a match by selecting a player and surplus split below

Player

 ▼

Keep

dollars out of 20.00 dollars

Submit

Do Nothing
