# Supplementary material for: Commitment and (in) Efficiency: A Bargaining Experiment
Source: Oxford University Press journal article supplement (doi:10.1093/jeea/jvaa012), 2020-04-21

Game 3.  
You are player B.

Available Surpluses

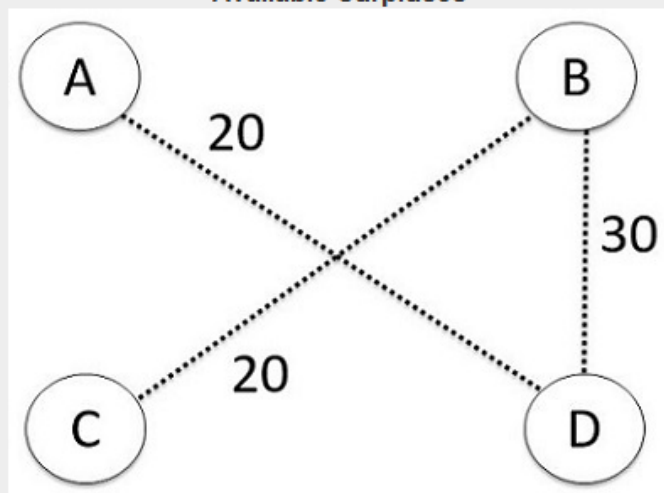

Current State of the Market

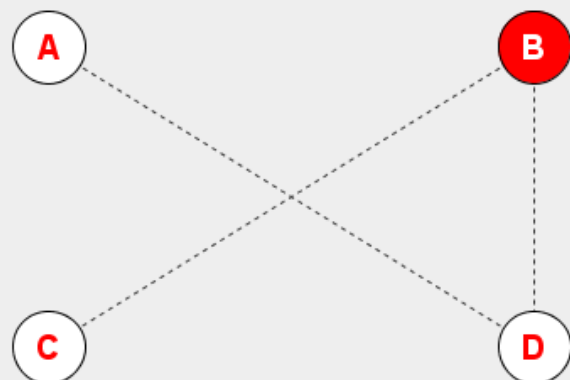

Offers **YOU** Proposed

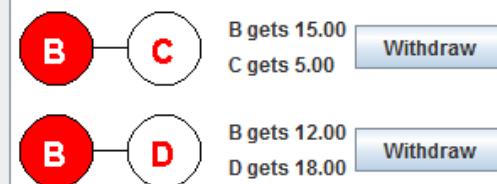

Offers Proposed By Others

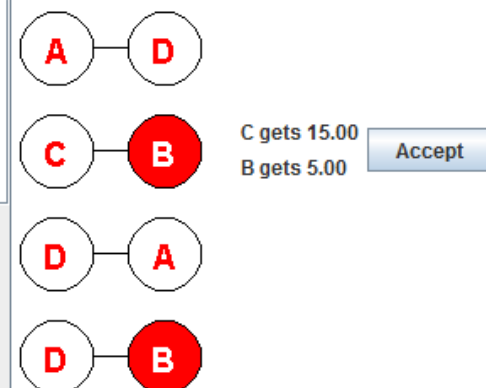

Supplement: jvaa012_agranov_elliott_teaching_materials.zip [file jvaa012_agranov_elliott_teaching_materials.zip]
