# Supplementary material for: Commitment and (in) Efficiency: A Bargaining Experiment
Source: Oxford University Press journal article supplement (doi:10.1093/jeea/jvaa012), 2020-04-21

Exit 25: Strong to Weak

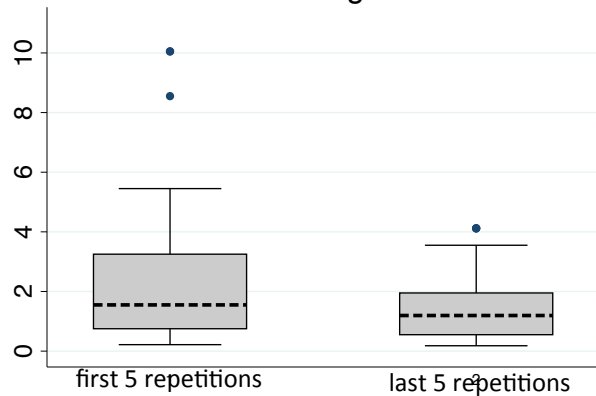

Exit 25: Strong to Strong

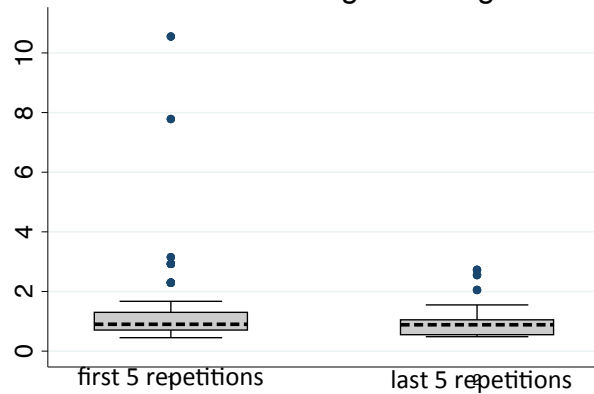

Exit 25: Weak to Strong

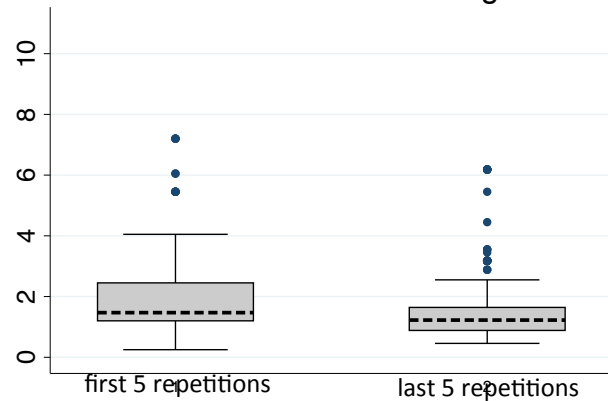

Exit 30: Strong to Strong

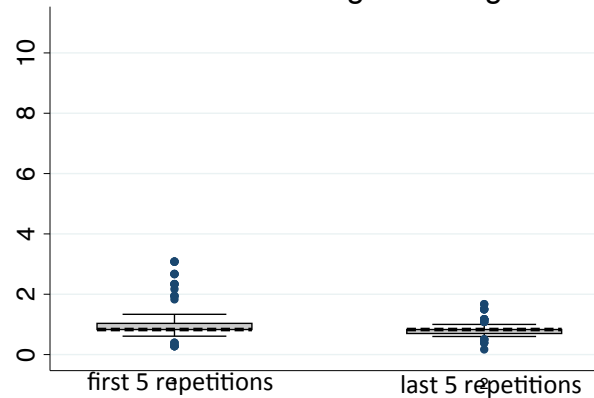

Exit 30: Weak to Strong

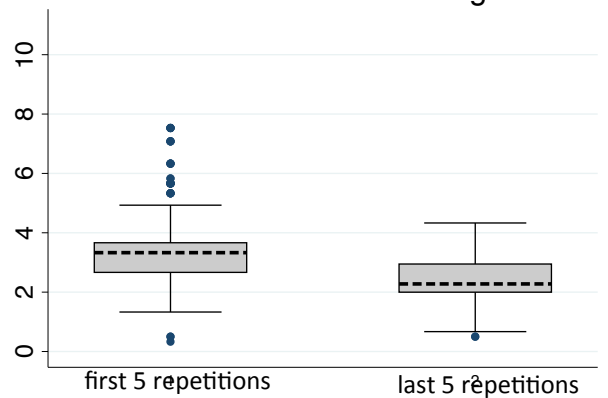

Supplement: jvaa012_agranov_elliott_teaching_materials.zip [file jvaa012_agranov_elliott_teaching_materials.zip]
