# Supplementary material for: Commitment and (in) Efficiency: A Bargaining Experiment
Source: Oxford University Press journal article supplement (doi:10.1093/jeea/jvaa012), 2020-04-21

**BASELINE 25**  
Strong to Weak

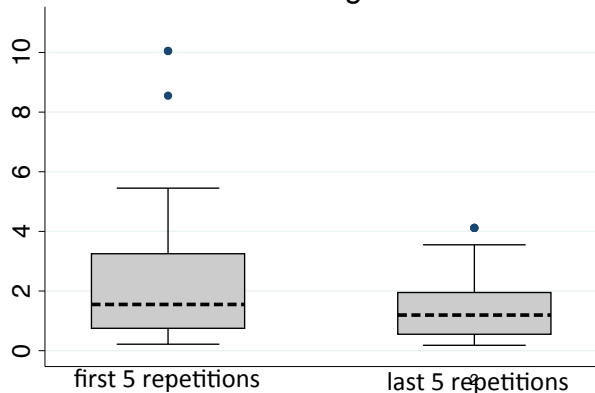

**BASELINE 25**  
Strong to Strong

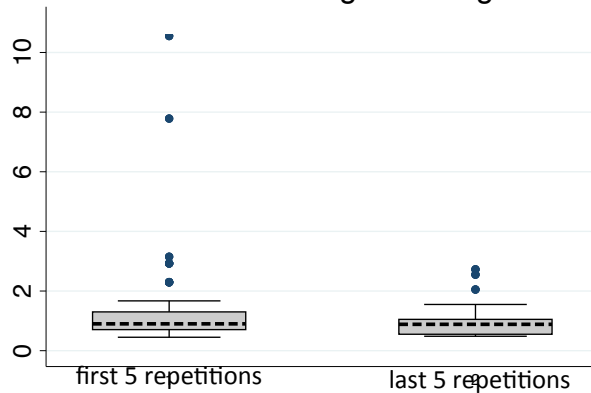

**BASELINE 25**  
Weak to Strong

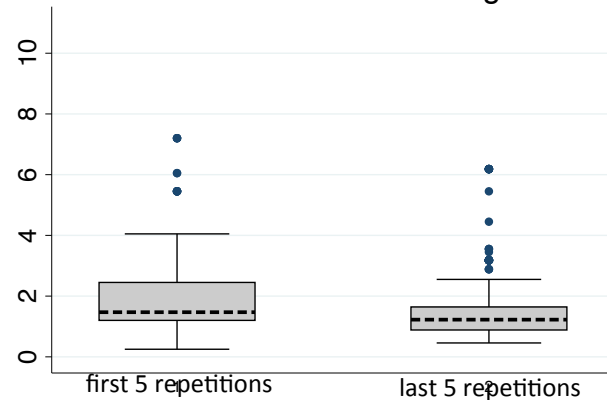

**BASELINE 30**  
Strong to Strong

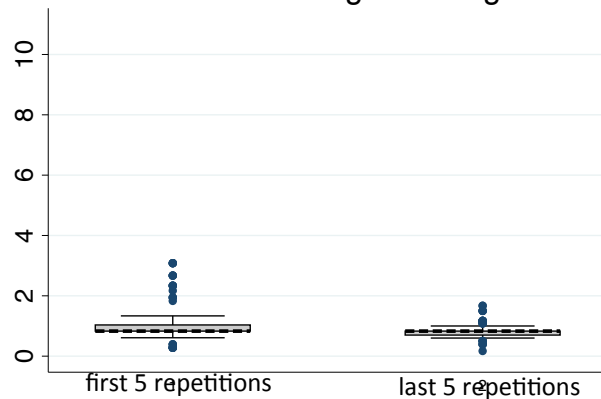

**BASELINE 30**  
Weak to Strong

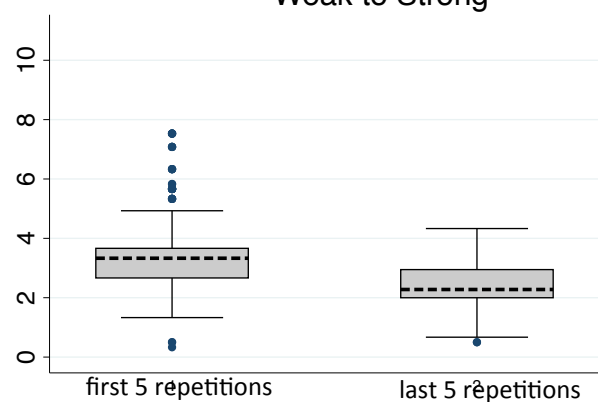

Supplement: jvaa012_agranov_elliott_teaching_materials.zip [file jvaa012_agranov_elliott_teaching_materials.zip]
