# Supplementary material for: Commitment and (in) Efficiency: A Bargaining Experiment
Source: Oxford University Press journal article supplement (doi:10.1093/jeea/jvaa012), 2020-04-21

## Exit 15: Acceptance Behavior of Strong Players

### first 5 games

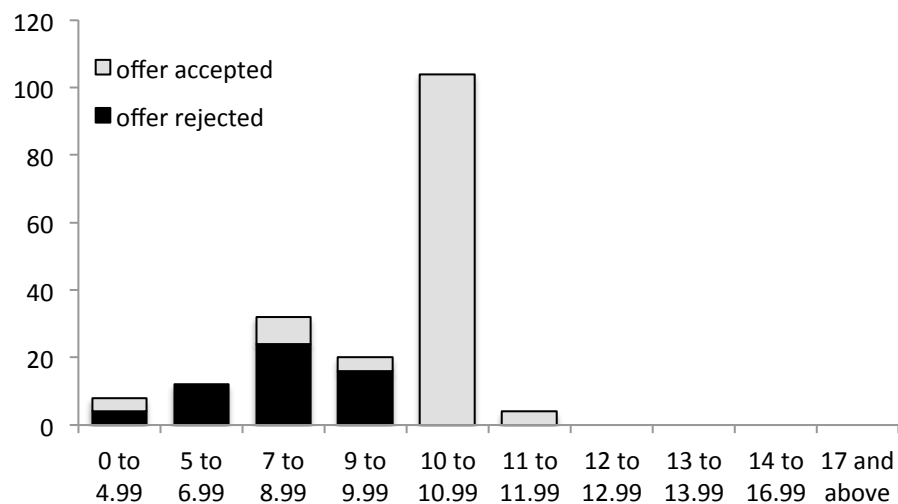

### last 5 games

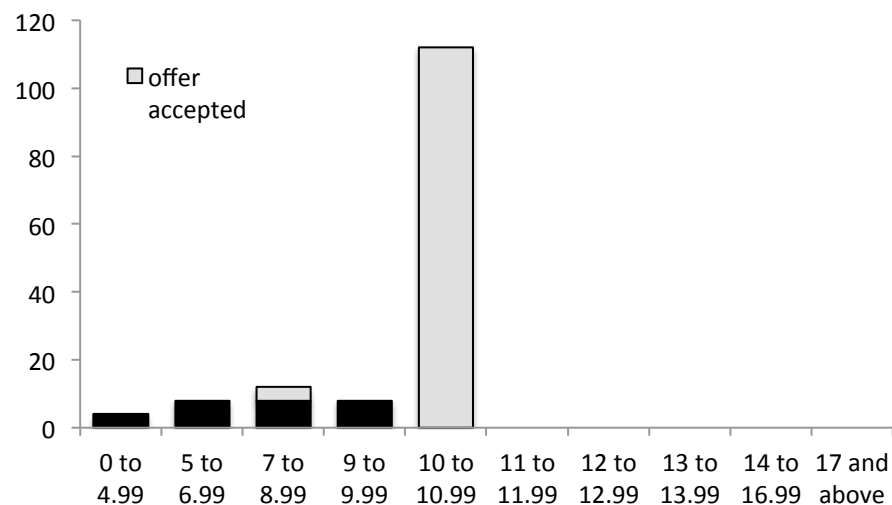

## Exit 15: Acceptance Behavior of Weak Players

### first 5 games

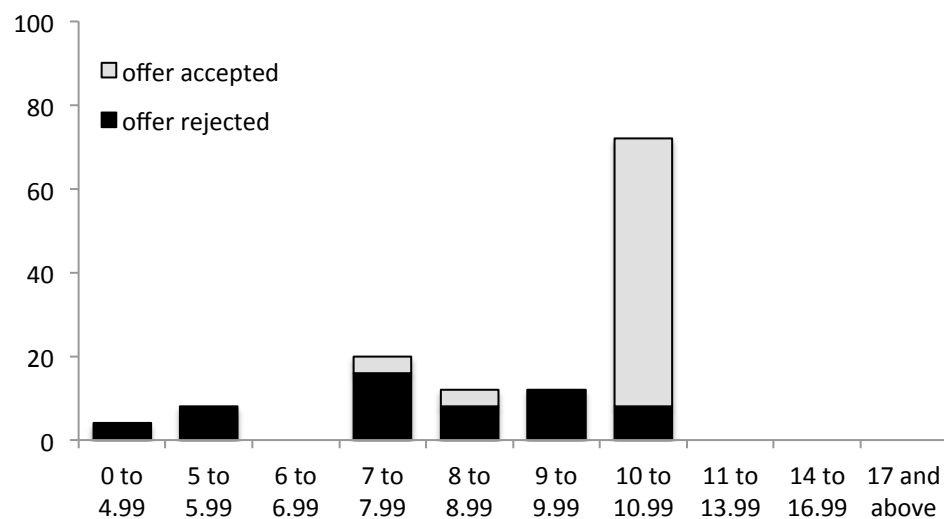

### last 5 games

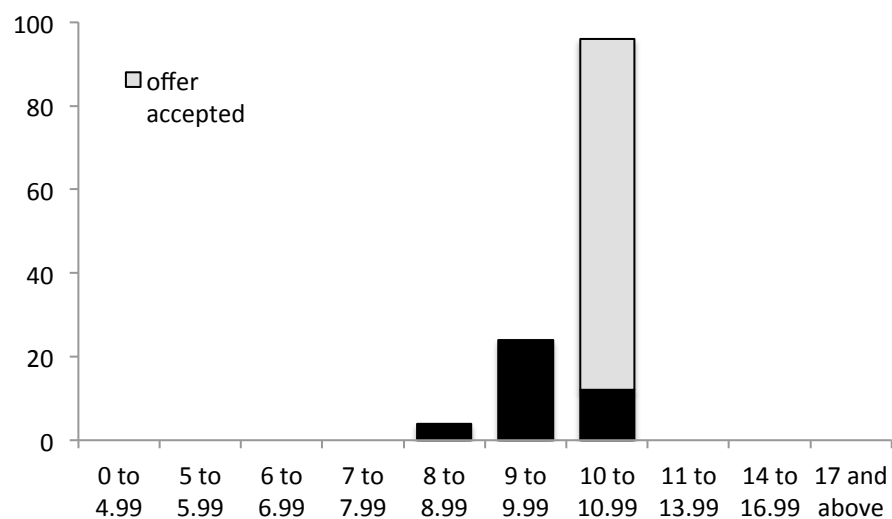

Supplement: jvaa012_agranov_elliott_teaching_materials.zip [file jvaa012_agranov_elliott_teaching_materials.zip]
