# Supplementary material for: Commitment and (in) Efficiency: A Bargaining Experiment
Source: Oxford University Press journal article supplement (doi:10.1093/jeea/jvaa012), 2020-04-21
Supplement: jvaa012_agranov_elliott_teaching_materials.zip [file jvaa012_agranov_elliott_teaching_materials.zip]

GAME 1, ROUND 1

You are player B.

The cost of separation is 0.10 dollars.

In the current game you have paid separation cost 0 times up until now.

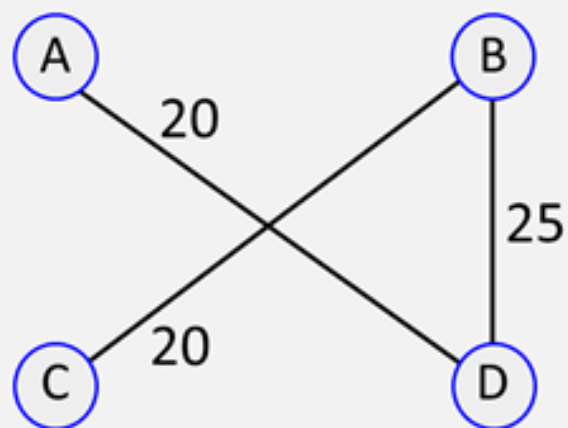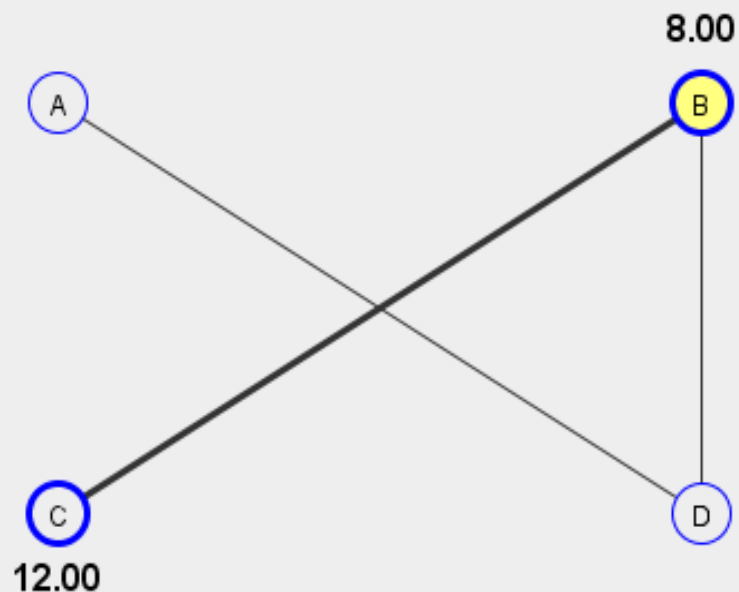

The responder accepted the match.  
The state of the network is updated above.
