# Supplementary material for: Commitment and (in) Efficiency: A Bargaining Experiment
Source: Oxford University Press journal article supplement (doi:10.1093/jeea/jvaa012), 2020-04-21
Supplement: jvaa012_agranov_elliott_teaching_materials.zip [file jvaa012_agranov_elliott_teaching_materials.zip]

# GAME 1, ROUND 1

You are player B.

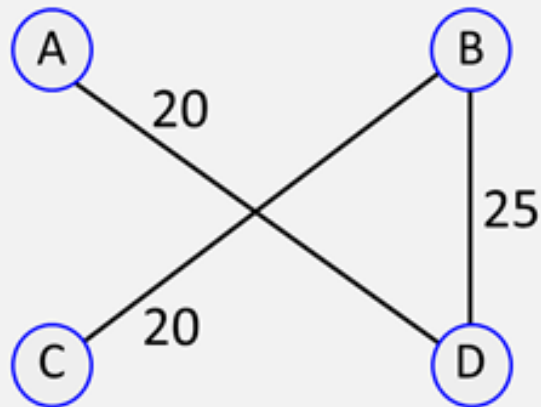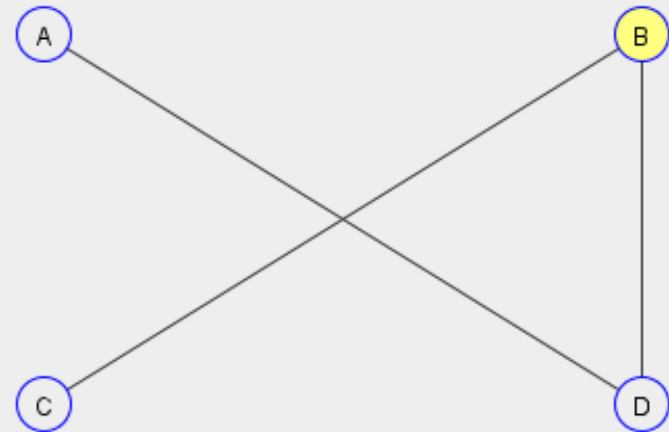

< 1 > >>

The proposer is player C.

You are the responder.

The proposer chose to keep 12.00 of the possible 20.00 dollars.

That means, if you accept you will get 8.00 dollars.

Please choose by clicking one of the buttons below.

Accept

Reject

SCREENSHOT 2
