# Supplementary material for: Commitment and (in) Efficiency: A Bargaining Experiment
Source: Oxford University Press journal article supplement (doi:10.1093/jeea/jvaa012), 2020-04-21

**BASELINE 15 – strong responders**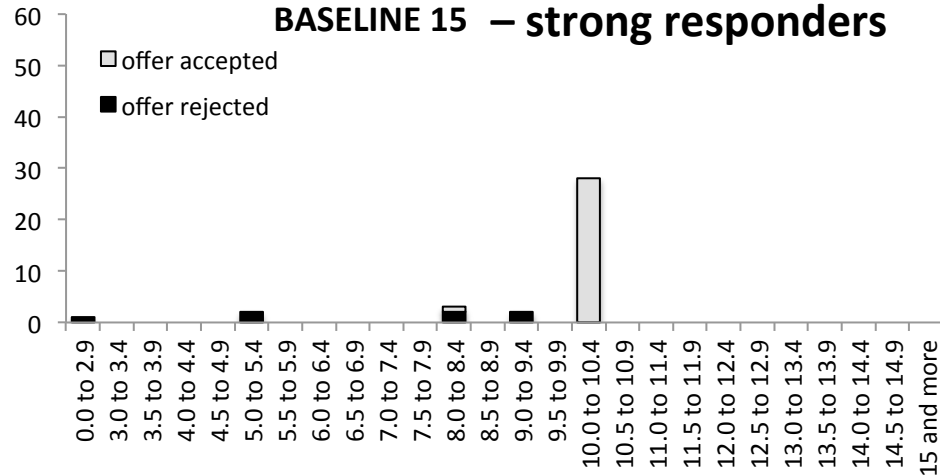**BASELINE 15 – weak responders**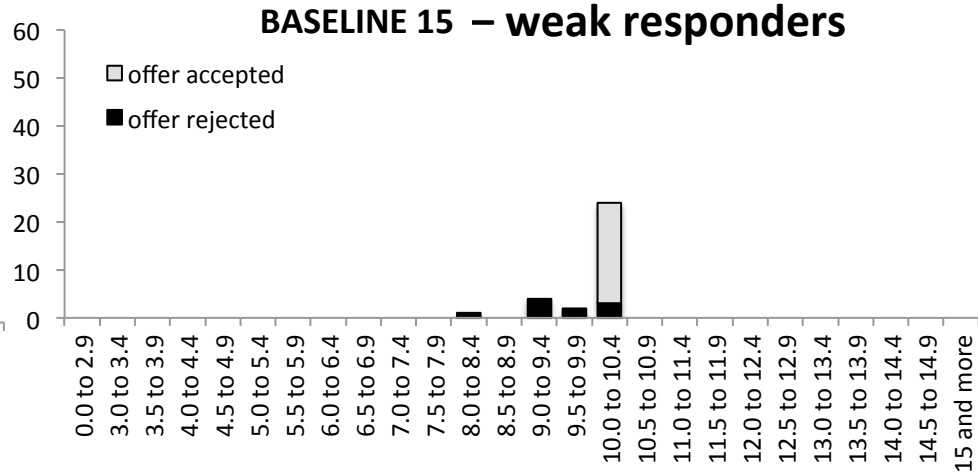**BASELINE 25 – strong responders**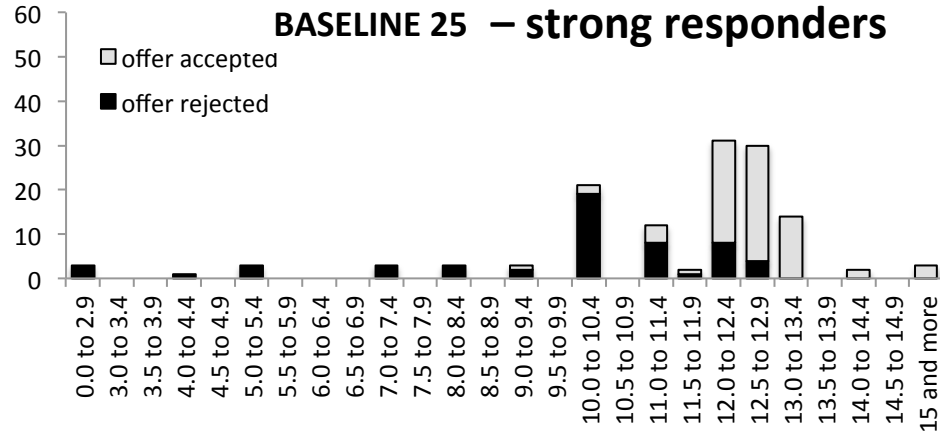**BASELINE 25 – weak responders**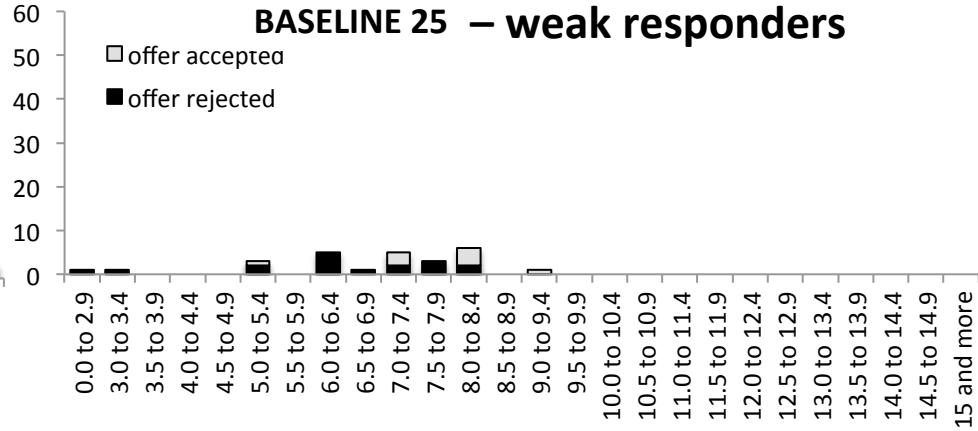**BASELINE 30 – strong responders**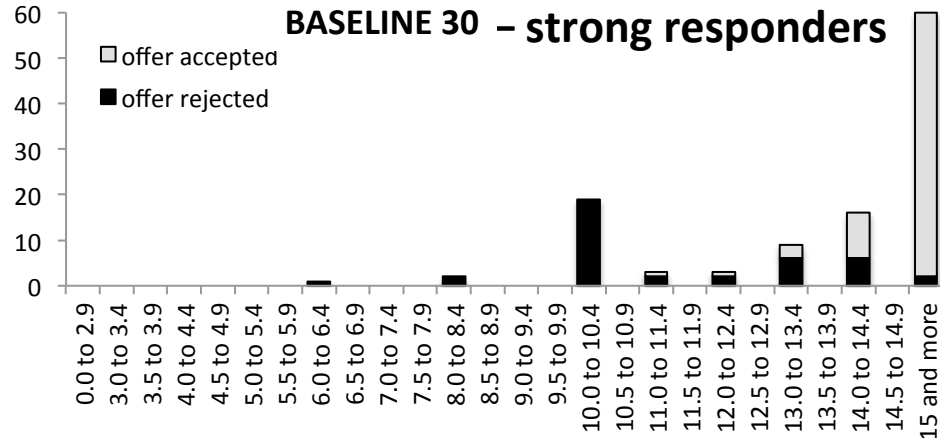**BASELINE 30 – weak responders**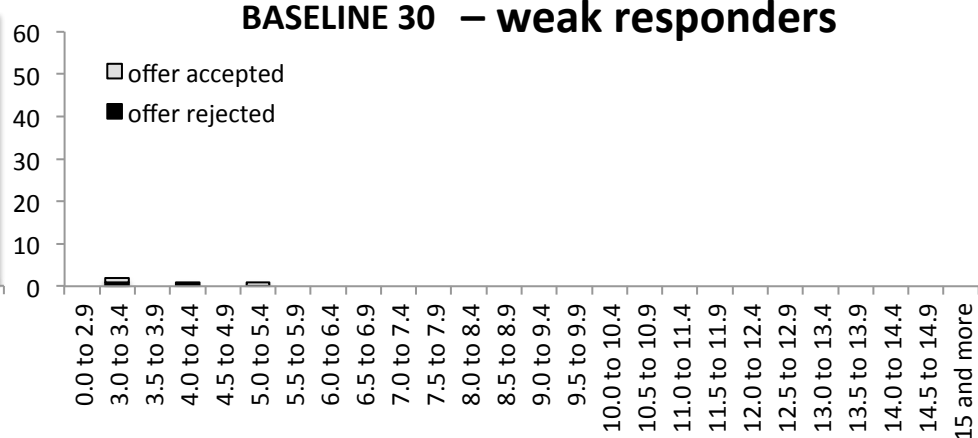

Supplement: jvaa012_agranov_elliott_teaching_materials.zip [file jvaa012_agranov_elliott_teaching_materials.zip]
